# Supplementary material for: Facemap: a framework for modeling neural activity based on orofacial tracking
Source: PubMed Central journal article supplement (PMC10774130; doi:10.1038/s41593-023-01490-6), 2023-11-20
Supplement: 41593_2023_1490_MOESM1_ESM.pdf [file 41593_2023_1490_MOESM1_ESM.pdf]

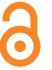

---

# Facemap: a framework for modeling neural activity based on orofacial tracking

---

In the format provided by the authors and unedited

## Supplementary Information

|                        | Facemap   | DeepLabCut (ResNet50) | DeepLabCut (Mobilenet) | SLEAP (default) | SLEAP (c=32) |
|------------------------|-----------|-----------------------|------------------------|-----------------|--------------|
| # Trainable parameters | 2,148,271 | 23,904,160            | 396,128                | 1,953,567       | 31,406,127   |
| # downsample blocks    | 5         | 5                     | 4                      | 5               | 5            |
| # upsample blocks      | 2         | 1                     | 1                      | 4               | 4            |

Table 1: **Network architecture details of the Facemap tracker, DeepLabCut and SLEAP models.** Number of trainable parameters and the number of downsample and upsample blocks used for each model. Facemap’s network is smaller than the standard “U-Net” architecture which is used in SLEAP [31,32]: it uses fewer channels per convolutional layer and has two upsampling blocks rather than four, instead predicting location refinement maps to obtain predictions at the full resolution (Figure 1a).

|                 | Facemap            | DeepLabCut (ResNet50) | DeepLabCut (Mobilenet) | SLEAP (default) | SLEAP (c=32) |
|-----------------|--------------------|-----------------------|------------------------|-----------------|--------------|
| V100            | <b>327.2 ± 0.6</b> | 150.1 ± 0.6           | 211.2 ± 1.7            | 80.0 ± 0.4      | 72.4 ± 0.4   |
| A100            | <b>343.1 ± 5.5</b> | 189.1 ± 1.1           | 243.8 ± 9.2            | 110.6 ± 1.4     | 103.0 ± 1.0  |
| RTX 2080 Ti     | <b>315.9 ± 1.5</b> | 132.5 ± 0.7           | 200.0 ± 0.5            | 88.9 ± 0.2      | 77.7 ± 0.2   |
| Tesla T4        | <b>272.9 ± 0.2</b> | 98.9 ± 1.0            | 203.4 ± 2.6            | 75.4 ± 0.6      | 64.1 ± 0.2   |
| Quadro RTX 8000 | <b>332.1 ± 0.2</b> | 138.9 ± 1.6           | 202.4 ± 1.3            | 92.7 ± 0.4      | 78.6 ± 0.5   |
| Colab           | <b>250.0 ± 4.5</b> | 98.5 ± 0.2            | 163.5 ± 0.5            | 110.5 ± 1.3     | 92.5 ± 0.8   |
| CPU             | 33.5 ± 1.2         | 19.2 ± 0.1            | <b>43.2 ± 1.2</b>      | 37.8 ± 1.0      | 19.6 ± 0.2   |

Table 2: **Processing speed of pose estimation models on different GPUs.** A sample image of size  $256 \times 256$  pixels was used as input for Facemap, DeepLabCut (ResNet50), DeepLabCut (Mobilenet), SLEAP (default) and SLEAP (c=32) models. The time taken for a forward pass through the network and post-processing steps was used to obtain processing speed for batch size of 1. A total of 1024 repetitions and 10 runs were used to obtain the average processing speed. The number of CPU cores/slots used for different GPUs were as follows: A100 (48 slots, 40GB/slot), V100 (48 slots, 30GB/slot), RTX 2080 Ti (40 slots, 18GB/slot), Tesla T4 (48, 15GB/slot) and Quadro RTX 8000 (40 slots, 18GB/slot). The CPU used was 3.0GHz Intel Cascade Lake(Gold 6248R) with 768GB and 8 slots used for timing on CPU only. Models were also run on Google Colab’s GPU.
